# Supplementary material
Source: Springer Nature journal article supplement (https://www.springermedizin.de/resource/supplementary/13046_2014_777_MOESM3_ESM.pdf/9662920)

**A**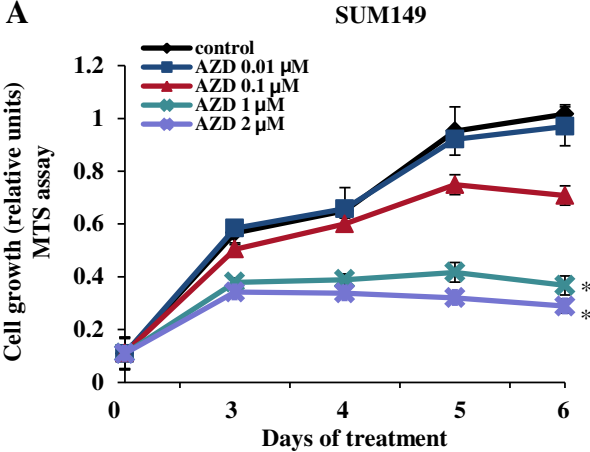**B**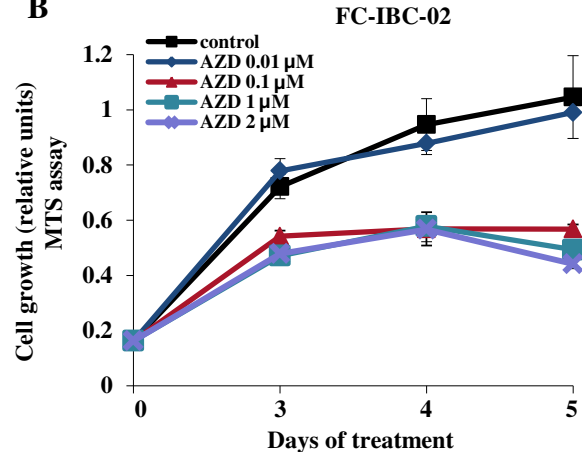**C**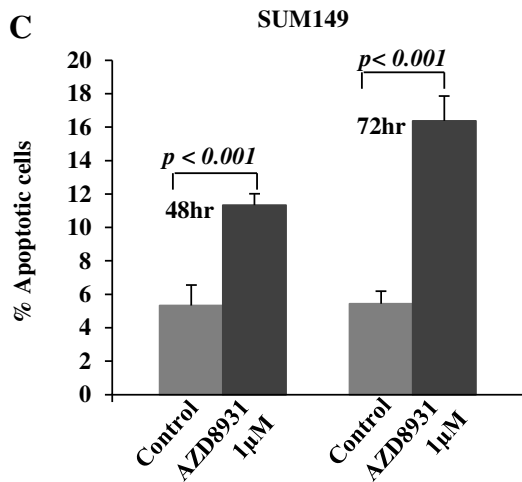**D**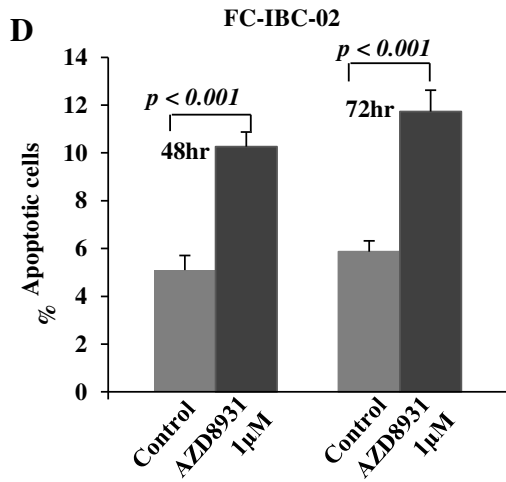

Supplement: MOESM3 [file 9662920]
